# Supplementary material for: First-emerging islet autoantibody and glucose metabolism: search for type 1 diabetes subtypes
Source: PubMed Central journal article supplement — Endocr Connect. 2022 Jul 27;11(9):e210632. doi: 10.1530/EC-21-0632 (PMC9422255; doi:10.1530/ec-21-0632), 2022-07-27
Supplement: supplementary_figure_2.pdf [file supplementary_figure_2.pdf]

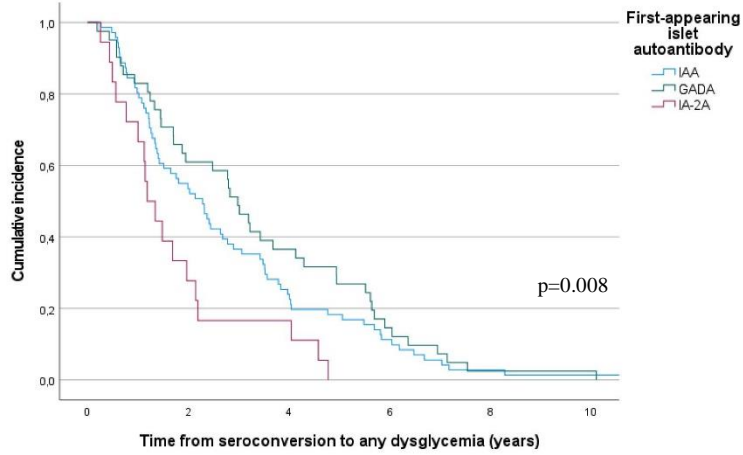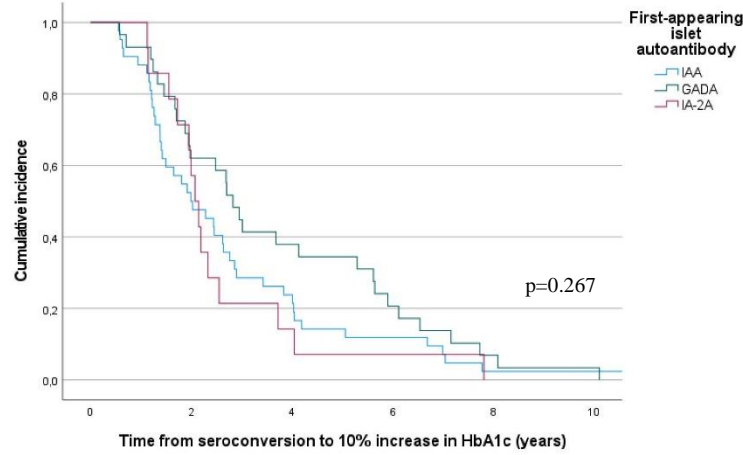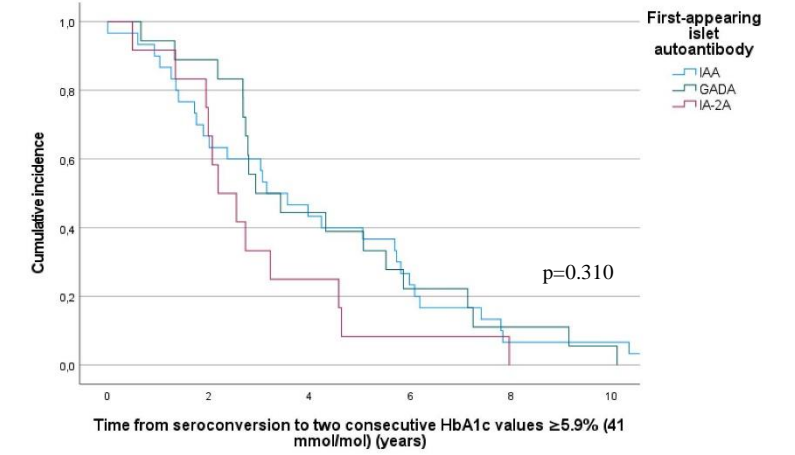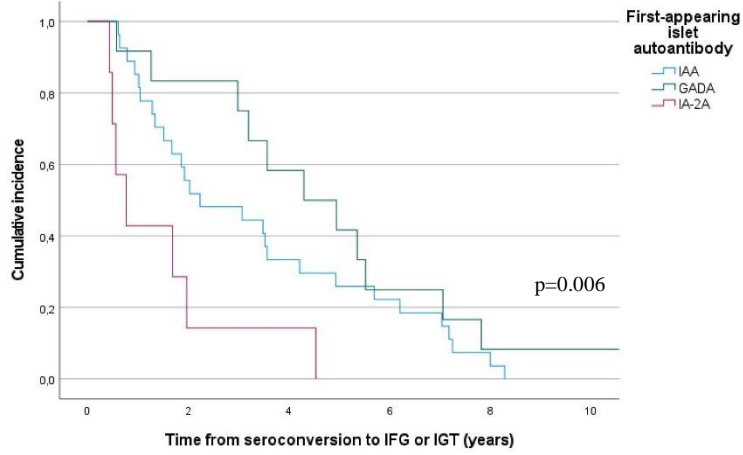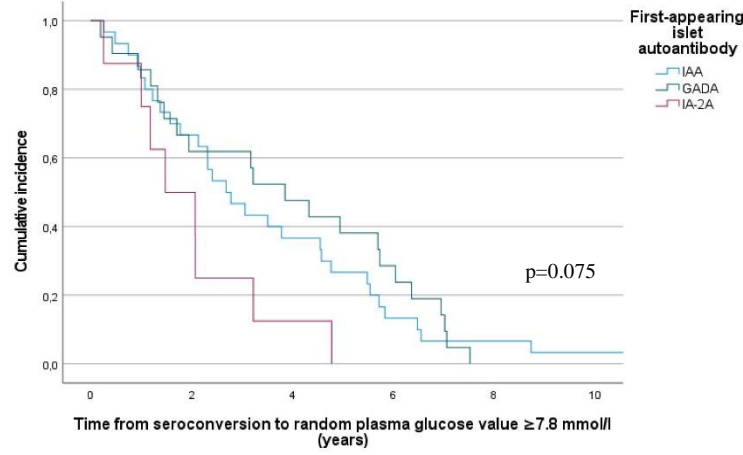

Time from seroconversion to different dysglycemia criteria including only children eventually progressing to overt disease
