# Supplementary material for: First-emerging islet autoantibody and glucose metabolism: search for type 1 diabetes subtypes
Source: PubMed Central journal article supplement — Endocr Connect. 2022 Jul 27;11(9):e210632. doi: 10.1530/EC-21-0632 (PMC9422255; doi:10.1530/ec-21-0632), 2022-07-27
Supplement: supplementary_material.pdf [file supplementary_material.pdf]

## **Supplementary material**

Supplement to:

Helminen O, Pokka T, Aspholm S et al. First-Emerging Islet Autoantibody and Glucose Metabolism – Search for Type 1 Diabetes Subtypes

Contents:

This Supplementary material presents Kaplan-Meier survival curves of time from seroconversion to detection of different dysglycemia criteria separately from the whole cohort and children eventually progressing to type 1 diabetes (Supplementary Figure 1 and 2). Supplementary Table 1 is also provided including overlap of different dysglycemia criteria.

Supplementary Figures 1 and 2. Supplementary Table 1

Supplementary Table 1: Table presenting the overlap of different dysglycemia criteria.

A=10% increase in HbA1c during a 3-12-month interval

B=Two consecutive HbA1c values  $\geq 5.9\%$  (41 mmol/mol)

C=IFG or IGT

D=Random plasma glucose value  $\geq 7.8$  mmol/l

|                                             | Study participants<br>N=524<br>n (%) | Progressors<br>N=197<br>n (%) | Non-progressors<br>N=327<br>n (%) |
|---------------------------------------------|--------------------------------------|-------------------------------|-----------------------------------|
| <b>None</b>                                 | 260 (49.6)                           | 69 (35.0)                     | 191 (58.4)                        |
| <b><i>Single dysglycemia criterion:</i></b> |                                      |                               |                                   |
| A                                           | 103 (19.7)                           | 20 (10.2)                     | 83 (25.4)                         |
| B                                           | 15 (2.9)                             | 5 (2.5)                       | 10 (3.1)                          |
| C                                           | 18 (3.4)                             | 9 (4.6)                       | 9 (2.8)                           |
| D                                           | 24 (4.6)                             | 18 (9.1)                      | 6 (1.8)                           |
| <b><i>Two dysglycemia criteria:</i></b>     |                                      |                               |                                   |
| A+B                                         | 32 (6.1)                             | 22 (11.2)                     | 10 (3.1)                          |
| A+C                                         | 14 (2.7)                             | 10 (5.1)                      | 4 (1.2)                           |
| A+D                                         | 8 (1.5)                              | 5 (2.5)                       | 3 (0.9)                           |
| B+C                                         | 9 (1.7)                              | 5 (2.5)                       | 4 (1.2)                           |
| B+D                                         | 3 (0.6)                              | 2 (1.0)                       | 1 (0.3)                           |
| C+D                                         | 5 (1.0)                              | 3 (1.5)                       | 2 (0.6)                           |
| <b><i>Three dysglycemia criteria:</i></b>   |                                      |                               |                                   |
| A+B+C                                       | 13 (2.5)                             | 11 (5.6)                      | 2 (0.6)                           |
| A+B+D                                       | 11 (2.1)                             | 10 (5.1)                      | 1 (0.3)                           |
| A+C+D                                       | 4 (0.8)                              | 3 (1.5)                       | 1 (0.3)                           |
| B+C+D                                       | 1 (0.2)                              | 1 (0.5)                       | 0 (0.0)                           |
| <b><i>Four dysglycemia criteria:</i></b>    |                                      |                               |                                   |
| A+B+C+D                                     | 4 (0.8)                              | 4 (2.0)                       | 0 (0.0)                           |
